# Supplementary material
Source: publisher figshare collection journal article supplement (https://rs.figshare.com/ndownloader/files/12543647)
Supplement: Supplementary file 1 [file 12543647]

## Sheet: Sheet1
Parent taxon	Species	COI	Accession	18S	Accession	16S	Accession	Histone H3	Accession
Ampeliscidae	Ampelisca brevicornis	Y	KJ183007	Y	KJ182983.1	N	na	N	na
	Ampelisca diadema	Y	KT209574.1	N	na	N	na	N	na
	Ampelisca eschrichtii	Y	FJ581489.1	Y	AY826963.1	N	na	N	na
	Ampelisca ledoyeri	Y	JQ653144.1	N	na	N	na	N	na
	Ampelisca sarsi	Y	KF808157.1	N	na	N	na	N	na
	Ampelisca spinipes	Y	KT209489.1	N	na	N	na	N	na
	Ampelisca tenuicornis	Y	KT208487.1	N	na	N	na	N	na
	Ampelisca typica	Y	JX100838.1	N	na	N	na	N	na
	Byblis gaimardi	Y	DQ889084.1	Y	AY826964.1	N	na	N	na
	Haploops tubicola	N	na	Y	AY826960.1	N	na	N	na
Amphilochidae	Amphilochus manudens	Y	KT208996	N	na	N	na	N	na
	Gitana sarsi	Y	KT209155.1	N	na	N	na	N	na
Aoridae	Aora gracilis	Y	KT209553	Y	DQ378019.1	N	na	N	na
	Aoroides columbiae	Y	JX545451.1	Y	JX545349.1	Y	JX545421.1	N	na
	Globosolembos ovatus	Y	KC706701.1	N	na	N	na	N	na
	Microdeutopus chelifer	Y	KF369152.1	N	na	N	na	N	na
	Paraoroides sp.	Y	EF989711.1	N	na	N	na	N	na
Caliopidae	Apherusa bispinosa	Y	KT209512.1	Y	DQ378009.1	N	na	N	na
	Apherusa glacialis	Y	GU145035.1	Y	JF266612.1	N	na	N	na
	Apherusa jurinei	Y	KT209484.1	Y	DQ378010	N	na	N	na
	Calliopius laeviusculus	Y	KT209158.1	Y	DQ378008.1	N	na	N	na
	Halirages fulvocinctus	Y	FJ581692.1	N	na	N	na	N	na
	Oligochinus lighti	N	na	Y	JX545373	N	na	N	na
	Weyprechtia pinguis	Y	DQ889174.1	N	na	N	na	N	na
Caprellidae	Aeginina longicornis	Y	DQ889075.1	N	na	N	na	N	na
	Caprella andreae	Y	KC146175.1	N	na	N	na	N	na
	Caprella acanthifera	N	na	Y	KJ182989.1	N	na	N	na
	Caprella acanthogaster	Y	DQ466520.1	N	na	N	na	N	na
	Caprella californica	Y	JX545460.1	Y	KF743482.1	Y	JX545431.1	N	na
	Caprella danilevskii	N	na	Y	AB295398.1	N	na	N	na
	Caprella dilatata	Y	KC146202.1	Y	KC146310	N	na	N	na
	Caprella geometrica	N	na	Y	AY781423.1	N	na	N	na
	Caprella linearis	Y	FJ581575.1	Y	DQ378039.1	N	na	N	na
	Caprella mutica	Y	FJ581579.1	Y	KJ193734.1	Y	JX545433.1	N	na
	Caprella penantis	Y	KC146307.1	Y	KC146344.1	N	na	N	na
	Caprella scaura	Y	KF743385.1	Y	KF743471.1	N	na	N	na
	Caprella scauroides	Y	KF743392.1	Y	KF743472.1	N	na	N	na
	Caprella septentrionalis	Y	FJ581591.1	N	na	N	na	Y	KJ530684.1
	Caprella simia	Y	KF743447	Y	KF743487.1	N	na	N	na
	Caprella unica	Y	DQ889141.1	Y	AY692347.1	N	na	N	na
	Paracaprella pusilla	Y	KF743535.1	N	na	N	na	N	na
	Paracaprella tenuis	Y	KF743539.1	N	na	N	na	N	na
	Perotripus sp.	N	na	Y	AB295401.1	N	na	N	na
	Phtisica marina	Y	KT209123.1	Y	DQ378040.1	N	na	N	na
	Protella gracilis	N	na	Y	AB295396.1	N	na	N	na
	Protogeton sp.	N	na	Y	AB295400.1	N	na	N	na
	Protomima imitatrix	N	na	Y	AB295399.1	N	na	N	na
	Pseudoprotella phasma	Y	KF430255.1	Y	DQ378041.1	Y	KF430284.1	Y	KF484713
	Pseudoprotella sp.	N	na	Y	AB295397.1	N	na	N	na
Corophiidae	Chelicorophium curvispinum	Y	KM009064.1	N	na	N	na	N	na
	Chelicorophium robustum	Y	KM009063.1	Y	HG322470.1	N	na	N	na
	Corophium volutator	Y	KT209362.1	Y	DQ378027.1	N	na	N	na
	Monocorophium acherusicum	Y	KP255339.1	Y	KJ193825.1	N	na	N	na
	Monocorophium insidiosum	Y	KT209419.1	Y	KJ193732.1	N	na	N	na
	Monocorophium sextonae	Y	KT209012.1	Y	KJ193746.1	N	na	N	na
	Paracorophium brisbanensis	Y	HQ857946.1	N	na	N	na	N	na
	Paracorophium excavatum	Y	HQ858008.1	N	na	N	na	N	na
	Paracorophium lucasi	Y	HQ857966.1	N	na	N	na	N	na
Cressidae	Cressa dubia	Y	KT209069	N	na	N	na	N	na
Dexaminidae	Dexamine thea	Y	KT209114.1	N	na	N	na	N	na
	Dexamine spinosa	Y	KJ183011	Y	KJ182990.1	N	na	N	na
Dulichiidae	Dulichia falcata	Y	KT209201.1	N	na	N	na	N	na
	Dulichia sp.	N	na	Y	AB295394.1	N	na	N	na
	Dyopedos bispinis	N	na	N	na	N	na	Y	KF986565.1
	Dyopedos porrectus	N	na	Y	DQ378020.1	N	na	Y	KF986568.1
Podoceridae	Podocerus inconspicuus	N	na	Y	AB295409.1	N	na	N	na
	Podocerus septemcarinatus	N	na	Y	DQ378021.1	N	na	N	na
	Podocerus variegatus	N	na	Y	DQ378022.1	N	na	Y	KF484721.1
Epimeriidae	Epimeria annabellae	Y	FM955293.1	N	na	N	na	N	na
	Epimeria bruuni	Y	FM955298.1	N	na	N	na	N	na
	Epimeria cornigera	Y	KT208490.1	Y	KJ193824.1	N	na	N	na
	Epimeria georgiana	Y	FM955305.1	Y	AF356546.1	N	na	N	na
	Epimeria grandirostris	Y	FM955307.1	Y	DQ378007.1	Y	KF430283.1	Y	KF484712.1
	Epimeria horsti	Y	FM955296.1	N	na	N	na	N	na
	Epimeria inermis	Y	JF271116.1	N	na	N	na	N	na
	Epimeria macrodonta	Y	AF451343.1	N	na	N	na	N	na
	Epimeria macronyx	Y	FM955309	N	na	N	na	N	na
	Epimeria puncticulata	Y	FM955301.1	N	na	N	na	N	na
	Epimeria reoproi	Y	AF451342.1	N	na	N	na	N	na
	Epimeria rimicarinata	Y	FM955303	N	na	N	na	N	na
	Epimeria robusta	Y	AF451344.1	N	na	N	na	N	na
	Epimeria rubrieques	Y	AF451345	N	na	N	na	N	na
	Epimeria schiaparelli	Y	AM176768	N	na	N	na	N	na
	Epimeria similis	Y	AF451346.1	Y	DQ378006.1	N	na	N	na
	Epimeria walkeri	Y	FM955308.1	N	na	N	na	N	na
	Paramphithoe hystrix	Y	FJ581852	N	na	N	na	N	na
Eusiridae	Eusirus cuspidatus	Y	FJ581636	N	na	N	na	N	na
	Eusirus giganteus	Y	JN001764.1	N	na	N	na	N	na
	Eusirus holmi	Y	FJ602463.1	N	na	N	na	N	na
	Eusirus microps	N	na	Y	DQ378011.1	N	na	N	na
	Eusirus perdentatus	Y	JN001784.1	Y	DQ378012.1	N	na	N	na
	Rhachotropis aculeata	Y	FJ581879.1	N	na	N	na	N	na
	Rhachotropis chathamensis	Y	GU804298.1	N	na	N	na	N	na
	Rhachotropis helleri	Y	JQ412477.1	N	na	N	na	N	na
	Rhachotropis inflata	Y	JQ412495.1	N	na	N	na	N	na
	Rhachotropis rossi	Y	JF498593.1	N	na	N	na	N	na
	Rhachotropis sp.	Y	EF989704.1	N	na	N	na	N	na
Hyperiidea	Cyllopus lucasii	Y	EF989691.1	Y	KC428887.1	N	na	Y	KC428938.1
	Cystisoma gershwinae	Y	EF989675.1	Y	KC428889	N	na	Y	KC428940
	Cystisoma pellucida	Y	EF989676.1	Y	KC428890	N	na	Y	KC428941.1
	Glossocephalus milneedwardsi	Y	EF989654.1	Y	KC428891.1	N	na	Y	KC428942.1
	Lanceola loveni	Y	EF989693.1	Y	KC428900.1	N	na	Y	KC428951.1
	Lycaea nasuta	Y	EF989647.1	Y	KC428905.1	N	na	Y	KC428956
	Microphasma agassizi	Y	EF989692.1	Y	KC428906.1	N	na	Y	KC428957.1
	Mimonectes loveni	Y	EF989698.1	Y	KC428907.1	N	na	Y	KC428958.1
	Phronima bucephala	Y	EF989680.1	Y	KC428911.1	N	na	Y	KC428962.1
	Scina borealis	Y	HM053504	Y	KC428919.1	N	na	Y	KC428970.1
	Themisto gaudichaudii	Y	HM053514.1	Y	AY743940.1	N	na	N	na
	Vibilia antarctica	Y	KC754385.1	Y	DQ378044.1	N	na	Y	KC428979
Ischyroceridae	Cerapus sp.	Y	EF998852.1	N	na	N	na	N	na
	Ericthonius pugnax	N	na	Y	AB295407.1	N	na	N	na
	Ericthonius punctatus	Y	JX545462.1	Y	DQ378016	Y	JX545434.1	N	na
	Ischyrocerus anguipes	Y	JX545466.1	Y	JX545366.1	Y	JX545438.1	N	na
	Ischyrocerus latipes	Y	DQ889106.1	N	na	N	na	N	na
	Jassa slatteryi	Y	EF989682.1	Y	AB295408.1	N	na	N	na
Leucothoidae	Leucothoe akuma	Y	KP896390.1	Y	JX145111.1	N	na	N	na
	Leucothoe ashleyae	Y	EF053411.1	Y	JF506071.1	N	na	N	na
	Leucothoe spinicarpa	N	na	Y	DQ378025	N	na	N	na
	Leucothoe vulgaris	Y	KP896391	Y	JX145112	N	na	N	na
Lysianassoidea	Abyssorchomene abyssorum	Y	KF430239.1	Y	KF430224.1	Y	KF430266.1	Y	KF484695.1
	Abyssorchomene chevreuxi	Y	GU109229.1	Y	KP347454.1	Y	KF430265.1	Y	KF484694.1
	Abyssorchomene nodimanus	Y	GU109260.1	N	na	N	na	N	na
	Anonyx sarsi	Y	FJ581508.1	N	na	N	na	N	na
	Bathycallisoma schellenbergi	Y	AY830441.1	Y	KP347453.1	Y	AY256969.1	N	na
	Centromedon zoe	Y	KF430236.1	Y	KF430221.1	Y	KF430263.1	Y	KF484692.1
	Cyclocaris sp.	Y	KF430245.1	Y	KF430230.1	Y	KF430272.1	Y	KF484701.1
	Eurythenes gryllus	Y	U92660.1	Y	AY826967.1	Y	U40437.1	Y	KF484702.1
	Falklandia reducta	Y	GU109256.1	N	na	N	na	N	na
	Hirondellea dubia	Y	AY183359.1	Y	KP347459.1	Y	KP456065.1	N	na
	Hirondellea namarensis	Y	KF430248.1	Y	KF430233.1	Y	KF430375.1	Y	KF484704.1
	Lepidepecreum umbo	N	na	Y	AY826968.1	N	na	N	na
	Onesimoides sp.	Y	JQ246436.1	Y	JQ246437.1	N	na	N	na
	Orchomene oxystoma	Y	KF430242.1	Y	KF430227.1	Y	KF430269.1	Y	KF484698.1
	Orchomene pectinatus	Y	KF430241.1	Y	KF430226.1	Y	KF430268.1	Y	KF484697.1
	Orchomenella franklini	Y	GU109226.1	N	na	N	na	N	na
	Orchomenella gerulicorbis	Y	KF430240.1	Y	KP347455.1	Y	KF430267.1	Y	KF484696.1
	Orchomenyx macronyx	Y	GU109231.1	N	na	N	na	N	na
	Pseudorchomene coatsi	Y	GU109245.1	N	na	N	na	N	na
	Stephonyx biscayensis	Y	KF430237.1	Y	KF430222.1	Y	KF430264.1	Y	KF484693.1
	Tmetonyx sp.	Y	KF430247.1	Y	KF430232.1	Y	KF430274.1	Y	KF484703.1
	Uristes murrayi	Y	GU109268.1	Y	AY826965.1	N	na	N	na
	Uristes sp.	Y	KP713947.1	Y	KP347458.1	Y	KP456063.1	N	na
Maeridae	Elasmopus rapax	Y	KF369125.1	N	na	N	na	N	na
	Maera danae	N	na	N	na	Y	AB432976.1	N	na
	Maera sp.	N	na	N	na	Y	AB432978.1	N	na
	Paraceradocus gibber	N	na	Y	AF419232.1	N	na	N	na
	Quadrimaera inaequipes	Y	KF369148.1	Y	AF419229.1	N	na	N	na
	Quadrimaera pacifica	N	na	N	na	Y	AB432980.1	N	na
Melitidae	Exitomelita sigynae	Y	JN831764.1	N	na	N	na	N	na
	Megamoera subtener	Y	AY926678.1	Y	AY926855.1	N	na	N	na
	Melita dentata	Y	FJ581757.1	Y	DQ378014.1	N	na	N	na
	Melita formosa	Y	FJ581759.1	N	na	N	na	N	na
	Melita matilda	Y	KC517350.1	N	na	N	na	N	na
	Melita nitida	Y	AY926679.1	Y	AY926795.1	Y	AY926733.1	N	na
	Melita palmata	Y	KT208397.1	N	na	N	na	N	na
	Norcapensis mandibulis	Y	JQ608487.1	N	na	N	na	N	na
Melphidippidae	Melphidippa antarctica	N	na	Y	DQ377998.1	Y	KF430289.1	Y	KF484719.1
Oedicerotidae	Arrhis phyllonyx	N	na	Y	AF419235.1	N	na	N	na
	Bathymedon obtusifrons	N	na	Y	AF419236.1	N	na	N	na
	Deflexilodes intermedius	Y	FJ581764.1	N	na	N	na	N	na
	Monoculodes antarcticus	Y	AF451356.1	N	na	N	na	N	na
	Monoculodes carinatus	N	na	Y	AF419230.1	N	na	N	na
	Monoculodes packardi	N	na	Y	DQ378015.1	N	na	N	na
	Oediceros saginatus	Y	FJ581790.1	N	na	N	na	N	na
	Paroediceros propinquus	N	na	N	na	N	na	N	na
	Rostroculodes borealis	Y	EF432738.1	N	na	N	na	N	na
Photidae	Gammaropsis melanops	N	na	Y	DQ378028.1	N	na	N	na
	Gammaropsis nitida	Y	KT208645.1	N	na	N	na	N	na
	Gammaropsis utinomii	N	na	Y	AB295406.1	N	na	N	na
	Megamphopus cornutus	Y	KT208454.1	N	na	N	na	N	na
	Photis longicaudata	Y	KT208497.1	N	na	N	na	N	na
Phoxocephalidae	Fuegiphoxus abjectus	N	na	Y	AY826972.1	N	na	N	na
	Harpinia antennaria	Y	KT209377.1	N	na	N	na	N	na
Pleustidae	Pleustes panoplus	Y	FJ581859.1	Y	DQ378034.1	N	na	N	na
Pontogeneiidae	Paramoera erimoensis	N	na	N	na	N	na	N	na
	Paramoera koysama	N	na	N	na	N	na	N	na
	Pontogeneia rostrata	Y	JX545474.1	Y	JX545416.1	Y	JX545447.1	N	na
	Sternomoera japonica	N	na	N	na	N	na	N	na
	Sternomoera morinoi	N	na	N	na	N	na	N	na
	Sternomoera rhyaca	N	na	N	na	N	na	N	na
	Sternomoera yezoensis	N	na	N	na	N	na	N	na
Stegocephalidae	Andaniexis lupus	N	na	Y	AY826969.1	N	na	N	na
	Andaniopsis nordlandica	N	na	Y	AY826971.1	N	na	N	na
	Stegocephalus inflatus	N	na	Y	AY826970.1	N	na	N	na
Stenothoidae	Antatelson walkeri	N	na	Y	AY826961.1	N	na	N	na
	Metopa alderi	Y	KT209338.1	N	na	N	na	N	na
	Stenothoe brevicornis	N	na	Y	AY826962.1	N	na	N	na
	Stenothoe marina	Y	KT208537.1	N	na	N	na	N	na
	Stenothoe monoculoides	Y	KT208446.1	N	na	N	na	N	na
	Stenula rubrovittata	Y	KT208695.1	N	na	N	na	N	na
Synopiidae	Synopia sp.	Y	EF989701.1	N	na	N	na	N	na
	Syrrhoe psychrophila	Y	KF430259.1	Y	DQ378030.1	N	na	Y	KF484718.1
Unciolidae	Neohela monstrosa	N	na	Y	DQ378018.1	N	na	N	na
Urothoidae	Urothoe brevicornis	N	na	Y	AY826973.1	N	na	N	na
	Urothoe elegans	Y	KT208637.1	N	na	N	na	N	na
	Urothoe poseidonis	Y	KT208414.1	N	na	N	na	N	na
	Urothoe pulchella	Y	KJ183013.1	Y	KJ182995.1	N	na	N	na
Anthuroidea	Apanthura sp.	Y	AF255789.1	N	na	Y	AF259545.1	N	na
	Caenanthura sp.	Y	KP225160.1	N	na	N	na	N	na
	Colanthura pigmentata	Y	KR095339.1	N	na	N	na	N	na
	Cyathura carinata	N	na	Y	AF332146.1	Y	AJ388072.1	N	na
	Cyathura sp.	N	na	Y	KC428886.1	N	na	Y	KC428937.1
	Paranthura japonica	N	na	Y	GQ302713.1	Y	GQ302694.1	N	na
	Paranthura nigropunctata	N	na	Y	AF279598.1	N	na	N	na
Antarcturidae	Antarcturus spinacoronatus	N	na	Y	AF279604.1	Y	AF268206.1	N	na
Arcturidae	Arcturus baffini	Y	DQ889078.1	N	na	N	na	N	na
	Astacilla intermedia	Y	KT208555.1	N	na	N	na	N	na
	Astacilla longicornis	Y	KT208682.1	N	na	N	na	N	na
Cirolanidae	Antrolana lira	Y	EF670465.1	N	na	Y	EF460861.1	N	na
	Bathynomus doederleinii	Y	AB851912.1	N	na	Y	AF501683.1	N	na
	Bathynomus giganteus	Y	AY566523.1	N	na	Y	AF501684.1	N	na
	Cirolana harfordi	Y	AF260838.1	N	na	Y	AF259543.1	N	na
	Cirolana kokoru	N	na	Y	JF699513.1	N	na	N	na
	Cirolana rugicauda	Y	AF260840.1	N	na	Y	AF259544.1	N	na
	Cirolanides texensis	Y	AY566471.1	N	na	Y	AY570106	N	na
	Eurydice pulchra	Y	KT208410.1	Y	AF255690.1	N	na	N	na
	Excirolana braziliensis	Y	KP172594.1	N	na	N	na	N	na
	Excirolana chiltoni	Y	KJ592751.1	N	na	Y	AF260849.1	N	na
	Excirolana hirsuticauda	Y	FJ532099.1	N	na	N	na	N	na
	Excirolana mayana	Y	KP172617.1	N	na	Y	AF260851.1	N	na
	Marocolana delamarei	Y	EF526114.1	N	na	Y	DQ194363.1	N	na
	Natatolana borealis	Y	KT208809.1	N	na	N	na	N	na
	Natatolana gallica	Y	KT208657.1	N	na	N	na	N	na
	Natatolana meridionalis	N	na	Y	AF255691.1	N	na	N	na
	Natatolana rossi	Y	GQ302696.1	Y	GQ302712.1	Y	GQ302693.1	N	na
	Speocirolana hardeni	Y	AY566524.1	N	na	Y	AY570141.1	N	na
	Speocirolana thermydronis	Y	AY566526.1	N	na	Y	AY570144.1	N	na
	Sphaerolana affinis	Y	AY566518.1	N	na	Y	AY570109.1	N	na
	Sphaeromides virei	Y	AY998016.1	N	na	Y	DQ194360.1	N	na
	Typhlocirolana haouzensis	Y	EF526113.1	Y	AF453249.1	Y	AF356848.2	N	na
	Typhlocirolana moraguesi	N	na	Y	AF255692.1	Y	AF356849.1	N	na
Dendrotionidae	Acanthomunna spinipes	N	na	Y	EU414421.1	N	na	N	na
	Dendromunna sp.	N	na	Y	EU414422.1	N	na	N	na
	Dendrotion sp.	N	na	Y	EU414423.1	N	na	N	na
Desmosomatidae	Chelator aequabilis	Y	KJ578689.1	Y	KJ578681.1	Y	KJ578662.1	N	na
	Chelator insignis	Y	KJ578692.1	Y	KJ630818.1	Y	KJ630811.1	N	na
	Chelator rugosus	Y	KJ578683.1	Y	KJ578677.1	Y	KJ578668.1	N	na
	Chelator sp.	N	na	N	na	N	na	N	na
	Chelator vulgaris	N	na	Y	KJ630816.1	Y	KJ630813.1	N	na
	Disparella sp.	N	na	N	na	N	na	N	na
	Eugerda sp.	N	na	Y	AY461463.1	N	na	N	na
	Eugerdella huberti	Y	HQ214677.1	Y	KJ578682.1	Y	HQ214679.1	N	na
	Eugerdella natator	N	na	Y	AY461462.1	N	na	N	na
	Eugerdella theodori	Y	KJ578699.1	Y	KJ578679.1	Y	KJ578673.1	N	na
	Mirabilicoxa sp.	N	na	Y	AY461461.1	N	na	N	na
	Parvochelus russus	Y	KJ578695.1	Y	KJ578674.1	Y	KJ578672.1	N	na
	Prochelator sp.	Y	KJ736043.1	N	na	N	na	N	na
	Whoia sp.	Y	KJ736051.1	N	na	N	na	N	na
Gnathiidae	Elaphognathia rangifer	Y	AB713955.1	N	na	N	na	N	na
	Gnathia limicola	Y	AB713956.1	N	na	N	na	N	na
	Gnathia maculosa	Y	AB713960.1	N	na	N	na	N	na
	Gnathia trimaculata	Y	AB713957.1	N	na	N	na	N	na
Haplomunnidae	Thylakogaster sp.	N	na	Y	EU414425.1	N	na	N	na
Haploniscidae	Antennuloniscus armatus	N	na	Y	AY461468.1	N	na	N	na
	Antennuloniscus sp.	N	na	Y	EU414426.1	N	na	N	na
	Chaulidoniscus sp.	N	na	Y	EU414427.1	N	na	N	na
	Haploniscus cassilatus	N	na	Y	DQ435679.1	N	na	N	na
	Haploniscus cucullus	N	na	N	na	N	na	N	na
	Haploniscus nondescriptus	N	na	Y	EU414428.1	N	na	N	na
	Haploniscus nudifrons	N	na	Y	DQ435680.1	N	na	N	na
	Haploniscus rostratus	Y	JF283460.1	Y	EU414429.1	N	na	N	na
	Haploniscus sp.	N	na	Y	AY461465.1	Y	AY693403.1	N	na
	Haploniscus spinifer	N	na	Y	EU414430.1	N	na	N	na
	Haploniscus weddellensis	N	na	Y	DQ435681.1	N	na	N	na
	Hydroniscus sp.	N	na	Y	EU414433.1	N	na	N	na
	Mastigoniscus polygomphios	N	na	Y	EU414434.1	N	na	N	na
	Mastigoniscus sp.	N	na	Y	AY461469.1	Y	AY693399.1	N	na
Ischnomesidae	Gracilimesus insignis	N	na	Y	AY461473.1	N	na	N	na
	Haplomesus sp.	N	na	Y	AY461474.1	N	na	N	na
	Ischnomesus sp.	N	na	Y	EU414435.1	N	na	N	na
	Stylomesus sp.	N	na	Y	EU414436.1	N	na	N	na
Janirellidae	Janirella sp.	N	na	Y	AY461475.1	N	na	N	na
Janiridae	Carpias nereus	N	na	Y	AF496657.1	N	na	N	na
	Iais pubescens	N	na	Y	EU414437.1	N	na	N	na
	Ianiropsis epilittoralis	Y	EF682303.1	Y	EF682260.1	Y	AF260859.1	N	na
	Iathrippa sarsi	N	na	Y	EU414438.1	N	na	N	na
	Iathrippa trilobatus	N	na	Y	AF279606.1	N	na	N	na
	Jaera albifrons	Y	FJ581736.1	Y	AF279609.1	Y	AJ388078.1	N	na
	Jaera nordmanni	N	na	Y	AF279610.1	N	na	N	na
	Janira maculosa	Y	KT208628.1	Y	AF255700.1	N	na	N	na
	Neojaera antarctica	N	na	Y	AY461454.1	N	na	N	na
	Neojaera sp.	N	na	Y	EU414439.1	N	na	N	na
Macrostylidae	Macrostylis roaldi	Y	JX260254.1	Y	JX260351.1	Y	JX260348.1	N	na
	Macrostylis sp.	N	na	Y	EU414442.1	N	na	N	na
Munnidae	Munnidae sp.	Y	KJ736157.1	N	na	N	na	N	na
Munnopsidae	Acanthamunnopsis longicornis	Y	EF682265.1	Y	EF682220.1	N	na	N	na
	Acanthamunnopsis milleri	Y	EF682261.1	Y	EF682219.1	N	na	N	na
	Acanthocope galatheae	Y	EF682285.1	Y	AF496656.1	N	na	N	na
	Acanthocope sp.	Y	EF682286.1	Y	EF682240.1	N	na	N	na
	Betamorpha africana	Y	EF682292.1	Y	EF682248.1	N	na	N	na
	Betamorpha fusiformis	Y	EF682291.1	Y	EF116546.1	Y	EF116494.1	N	na
	Coperonus sp.	N	na	Y	EU414448.1	N	na	N	na
	Disconectes antarcticus	Y	EF682293.1	Y	EF682250.1	N	na	N	na
	Dubinectes acutitelson	Y	EF682294.1	Y	EU414452.1	N	na	N	na
	Dubinectes nodosus	N	na	Y	EU414453.1	N	na	N	na
	Echinozone sp.	N	na	Y	EF116549.1	Y	EF116491.1	N	na
	Eurycope complanata	Y	EF682281.1	Y	EF682256.1	N	na	N	na
	Eurycope eltaniae		na	Y	KJ716804.1	Y	KJ716802.1	N	na
	Eurycope glabra	Y	EF682280.1	Y	EF682255.1	N	na	N	na
	Eurycope sarsi	N	na	Y	AY461479.1	N	na	N	na
	Ilyarachna antarctica	Y	EF682299.1	Y	AY461481.1	N	na	N	na
	Ilyarachna triangulata	N	na	Y	EF682244.1	N	na	N	na
	Mimocopelates sp.		na	Y	EU414460.1	N	na	N	na
	Munneurycope murrayi	Y	EF682275.1	Y	EF682232.1	N	na	N	na
	Munneurycope sp.	Y	EF682278.1	Y	EF682236.1	N	na	N	na
	Munnopsis abyssalis	Y	EF682273.1	Y	EF682222.1	N	na	N	na
	Munnopsis sp.	N	na	Y	EF682225.1	N	na	N	na
	Munnopsoides sp.	Y	EF682271.1	Y	EF682224.1	N	na	N	na
	Munnopsurus sp.	Y	EF682288.1	Y	EF682238.1	N	na	N	na
	Notopais magnifica	N	na	Y	EU414454.1	N	na	N	na
	Paramunnopsis sp.	Y	EF682266.1	Y	EF682230.1	N	na	N	na
	Paropsurus giganteus	Y	EF682287.1	Y	EF682253.1	N	na	N	na
	Storthyngura kussakini	N	na	Y	EU414465.1	N	na	N	na
	Storthyngurella menziesi	N	na	Y	EU414464.1	N	na	N	na
	Syneurycope heezeni	Y	EF682295.1	Y	EU414466.1	N	na	N	na
	Syneurycope sp.	Y	EF682296.2	Y	EF682243.1	N	na	N	na
	Tytthocope sp.	Y	EF682290.1	Y	EF682252.1	N	na	N	na
	Vanhoeffenura sp.	Y	EF682284.1	Y	EF682239.1	N	na	N	na
Nannoniscidae	Austroniscus sp.	N	na	Y	EU414469.1	N	na	N	na
	Nannoniscus sp.	N	na	Y	EU414470.1	N	na	N	na
Thambematidae	Thambema sp.	Y	KJ736122.1	N	na	N	na	N	na
Agathotanaidae	Agathotanais ingolfi	Y	KJ934609.1	N	na	N	na	N	na
	Paranarthrura sp.	N	na	Y	AB618196.1	N	na	N	na
Apseudidae	Apseudes talpa	Y	JF927715.1	Y	KJ182985.1	N	na	Y	JF927716.1
	Apseudopsis latreillii	N	na	Y	KJ182984.1	Y	AJ388110.1	N	na
	Atlantapseudes sp.	N	na	Y	AB618176.1	N	na	N	na
	Carpoapseudes varindex	N	na	Y	AB618177.1	N	na	N	na
	Fageapseudes brachyomos	N	na	Y	AB618174.1	N	na	N	na
	Leviapseudes sp.	N	na	Y	AB618178.1	N	na	N	na
	Paradoxapseudes (Apseudes) bermudeus	N	na	Y	GQ175865.1	N	na	Y	HM016178.1
	Paradoxapseudes littoralis	N	na	Y	AB618175.1	N	na	N	na
Leptocheliidae	Leptochelia rapax	Y	KP254749.1	N	na	N	na	Y	HM016183.1
	Leptochelia dubia	Y	HM016215.1	N	na	N	na	Y	HM016187.1
	Leptochelia forresti	Y	KP254788.1	N	na	N	na	N	na
	Leptochelia itoi	N	na	Y	AB618197.1	N	na	N	na
	Leptochelia sp.	N	na	Y	AF496660.1	N	na	N	na
	Pseudoleptochelia sp.	Y	HM016202.1	N	na	N	na	Y	HM016173.1
Neotanaidae	Neotanais sp.	N	na	Y	AB618189.1	N	na	N	na
	Venusticrus thor	Y	KT592232.1	N	na	N	na	N	na
Nototanaidae	Nesotanais ryukyuensis	N	na	Y	AB618198.1	N	na	N	na
	Nototanais sp.	N	na	N	na	N	na	Y	HM016188.1
Sphyrapodidae	Pseudosphyrapus serratus	N	na	Y	AB618187.1	N	na	N	na
	Pseudosphyrapus quintolongus	N	na	Y	AB618185.1	N	na	N	na
Pseudotanaidae	Pseudotanais sp.	N	na	N	na	N	na	Y	HM016172.1
Bodotriidae	Bodotria scorpioides	Y	KT208398.1	N	na	N	na	N	na
	Cumopsis goodsir	Y	AF137518.1	N	na	N	na	N	na
	Cyclaspis alba	Y	AF137517.1	N	na	N	na	N	na
	Cyclaspis caprella	Y	DQ889092.1	N	na	N	na	N	na
	Eocuma longicorne	Y	AF520445.1	N	na	N	na	N	na
	Heterocuma sp.	Y	AF520443.1	N	na	N	na	N	na
	Iphinoe trispinosa	Y	AF137519.1	Y	KJ182988	N	na	N	na
	Iphinoe truncata	Y	DQ070286.1	N	na	N	na	N	na
	Leptocuma sp.	Y	AF520444.1	N	na	N	na	N	na
	Mancocuma stellifera	Y	AF137520.2	N	na	N	na	N	na
	Pomacuma australiae	Y	AF352302.2	N	na	N	na	N	na
	Spilocuma salomani	N	na	Y	AY781432.1	N	na	N	na
	Vaunthompsonia cristata	Y	AF352301.2	N	na	N	na	N	na
Diastylidae	Colurostylis longicaudata	Y	AF520446.1	N	na	N	na	N	na
	Diastylis bispinosa	Y	AF137511.1	N	na	N	na	N	na
	Diastylis crenellata	Y	AF352298.1	N	na	N	na	N	na
	Diastylis rathkei	Y	AF069764.1	N	na	Y	HQ450555.1	N	na
	Diastylis rugosa	Y	KT209009.1	N	na	N	na	N	na
	Diastylis sculpta	Y	AF137510.1	Y	AY781431.1	Y	U81512.1	N	na
	Diastylopsis thileniusi	Y	AF520442.1	N	na	N	na	N	na
	Oxyurostylis lecroyae	Y	AF137513.1	N	na	N	na	N	na
	Oxyurostylis smithi	Y	AF137512.1	N	na	N	na	N	na
Lampropidae	Hemilamprops californicus	Y	AF061781.2	N	na	N	na	N	na
	Hemilamprops sp.	Y	AF520448.1	N	na	N	na	N	na
	Lamprops quadriplicata	Y	AF352297.2	N	na	N	na	N	na
	Lamprops sp.	N	na	Y	JN800572.1	Y	JN800544.1	Y	JN800701.1
Leuconidae	Eudorella pusilla	Y	AF137516.1	N	na	Y	U81513.1	N	na
	Eudorella truncatula	N	na	Y	KJ193737.1	N	na	N	na
Nannastacidae	Campylaspis sp.	Y	AF520450.1	N	na	N	na	N	na
	Cumella sp.	Y	AF520449.1	N	na	N	na	N	na
Pseudocumatidae	Monopseudocuma gilsoni	Y	KT208619.1	Y	KJ193843.1	N	na	N	na
	Pseudocuma simile	Y	AF137514.2	Y	KJ193845.1	N	na	N	na
Mysida	Boreomysis arctica	Y	FJ581526.1	Y	AM422481.1	N	na	N	na
	Gastrosaccus psammodytes	N	na	Y	AJ566087.1	N	na	N	na
	Hansenomysis fyllae	N	na	Y	AM422480.1	N	na	N	na
	Hemimysis anomala	Y	EU029162.1	Y	AJ566104.1	N	na	N	na
	Heteromysis formosa	Y	KP255226.1	Y	AY781419.1	Y	JN800542.1	Y	JN800699.1
	Michthyops parvus	N	na	Y	AM422490.1	N	na	N	na
	Mysis oculata	Y	EF609268.1	Y	AM422510.1	Y	DQ189194.1	N	na
	Neomysis americana	Y	FJ581783.1	Y	HM179998.1	Y	HM179997.1	N	na
	Praunus flexuosus	Y	KT208416.1	Y	AM422512.1	Y	JN800554.1	Y	JN800712.1
	Pseudomma affine	Y	AY624266.1	Y	AY624283.2	N	na	N	na
	Rhopalophthalmus sp.	N	na	Y	AM422488.1	N	na	N	na
	Siriella armata	Y	KT208432.1	Y	AJ566105.1	N	na	N	na
Bochusacea	Thetispelecaris remex	N	na	Y	AY781421.1	N	na	N	na
Lophogastrida	Eucopia sculpticauda	N	na	Y	AM422473.1	N	na	N	na
	Gnathophausia ingens	Y	DQ889115.1	Y	AY781416.1	N	na	N	na
	Gnathophausia zoea	Y	EF015490.1	Y	AM422474.1	N	na	N	na
	Lophogaster typicus	N	na	Y	AM422476.1	N	na	N	na
Spelaeogriphacea	Spelaeogriphus lepidops	N	na	Y	AY781414.1	N	na	N	na
Stygiomysida	Stygiomysis aemete	N	na	Y	AM422477.1	N	na	N	na
	Stygiomysis cokei	N	na	Y	AM422478.1	N	na	N	na
	Stygiomysis holthuisi	N	na	Y	AM422479.1	N	na	N	na
Thermosbaenacea	Tethysbaena argentarii	N	na	Y	AY781415.1	Y	DQ470612.1	N	na
Stomatopoda	Gonodactylellus viridis	N	na	Y	AY743947.1	N	na	N	na
	Gonodactylus chiragra	Y	AF205250.1	Y	HM138870.1	Y	AF107614.1	N	na
	Gonodactylus smithii	Y	AF205233.1	Y	HM138873.1	Y	AF107615.1	N	na
	Harpiosquilla harpax	Y	FJ229770.1	N	na	Y	FJ871137.1	N	na
	Lysiosquillina maculata	Y	HM138793.1	Y	HM138878.1	Y	AF107618.1	Y	JN800704.1
	Oratosquilla oratoria	Y	HM180743.1	N	na	Y	FJ224276.1	N	na
	Squilla empusa	Y	HM138809.1	Y	L81946.1	Y	JN800559.1	Y	JN800718.1
Leptostraca	Nebalia sp.	Y	FJ170237.1	Y	L81945.1	N	na	Y	AF110869.1
	Paranebalia longipes	N	na	Y	EF189630.1	Y	AY744909.1	Y	AY744905.1
Euphausiacea	Euphausia pacifica	Y	AF177184.1	Y	AY141010.1	Y	AF177176.1	N	na
	Meganyctiphanes norvegica	Y	AF177191.1	Y	DQ900731.1	Y	AY744910.1	Y	AY744906.1
	Nyctiphanes simplex	Y	AY601092.1	Y	DQ900732.1	Y	AY574928.1	N	na
Anaspidacea	Anaspides tasmaniae	Y	DQ889076.1	Y	L81948.1	Y	AF133683.1	N	na
Bathynellacea	Iberobathynella magna	Y	HQ659856.1	N	na	Y	AF503569.1	N	na
Anomura	Albunea catherinae	N	na	Y	KF182445.1	Y	JN800534.1	Y	JN800689.1
	Dardanus fucosus	N	na	Y	JN800563.1	Y	JN800537.1	N	na
	Emerita talpoida	Y	L43105.1	Y	AY743949.1	Y	KF182557.1	Y	KF182702.1
	Eumunida picta	Y	EU243556.1	Y	KF182464.1	Y	KF182518.1	Y	KF182690.1
	Oedignathus inermis	Y	EU329164.1	Y	Z14062.1	N	na	N	na
	Paguristes cadenati	N	na	Y	KF182493.1	Y	KF182540.1	Y	JN800707.1
	Pagurus pollicaris	Y	AF483160.1	Y	KF182458.1	Y	FJ869152.1	Y	KF182737.1
Upogebiidae	Upogebia major	Y	JX502989.1	N	na	Y	KF910454.1	N	na
	Upogebia pusilla	Y	KP136655.1	N	na	N	na	N	na
Brachyura	Austinograea alayseae	Y	KC603865.1	N	na	Y	JQ407449.1	N	na
	Austinograea rodriguezensis	Y	AB813071.1	N	na	Y	JQ407452.1	Y	JQ407464.1
	Bathynectes longispina	Y	JN800677.1	Y	JN800594.1	Y	JN800535.1	Y	JN800691.1
	Callinectes sapidus	Y	AY682072.1	Y	AY743951.1	Y	JX123476.1	Y	FM208798.1
	Carcinus maenas	Y	FJ581592.1	Y	AY583974.1	Y	AY583901.1	Y	DQ079669.1
	Eriocheir sinensis	Y	AF105247.1	Y	GU362670.1	Y	AF105243.1	N	na
	Geothelphusa dehaani	Y	KC545613.1	N	na	Y	AB290630.1	Y	AB290667.1
	Hemigrapsus sanguineus	Y	EU169901.1	N	na	Y	AJ493053.1	N	na
	Pseudocarcinus gigas	Y	HM638058.1	Y	HM638021.1	Y	HM637969.1	Y	HM596631.1
	Scylla paramamosain	Y	HQ687226.1	Y	KC902763.1	Y	FJ774905.1	Y	KJ133188.1
	Xenograpsus testudinatus	Y	AB933569.1	N	na	Y	FM863827.1	Y	FN434066.1
Polychelida	Polycheles typhlops	Y	JQ306297.1	Y	FJ174921.1	Y	FJ174890.1	Y	FJ174856.1
Astacidea	Astacus astacus	Y	DQ320049.1	Y	U33181.1	Y	GU727618.1	Y	DQ079660.1
	Cherax destructor	Y	FJ965956.1	Y	FJ965974.1	Y	AY191767.1	N	na
	Enoplometopus occidentalis	Y	KF828008.1	Y	AY583966.1	Y	AY583892.1	Y	KF828077.1
	Homarus americanus	Y	FJ581693.1	Y	AF235971.1	Y	EU882875.1	Y	FJ174854.1
	Neaxius glyptocercus	N	na	Y	EU874994.1	Y	EU874944.1	N	na
	Nephrops norvegicus	Y	JQ306231.1	Y	Y14812.1	Y	EU882880.1	Y	DQ079692.1
	Nihonotrypaea japonica	Y	JX502970.1	N	na	Y	EU882953.1	N	na
	Procambarus clarkii	Y	AY701195.1	Y	AF436001.1	Y	KJ645835.1	Y	EU921067.1
Caridea	Alvinocaris longirostris	Y	AB222050.2	Y	KP215300.1	Y	KP215285.1	Y	KP215342.1
	Atyoida bisulcata	Y	DQ681257.1	Y	DQ079738.1	Y	EF489995.1	Y	DQ079661.1
	Exopalaemon carinicauda	Y	HM180579.1	Y	HQ172894.1	Y	JF767296.1	Y	JN674393.1
	Hippolyte pleuracanthus	N	na	Y	AY743956.1	N	na	N	na
	Macrobrachium lanchesteri	Y	KP759427.1	Y	KP725754.1	Y	JF775468.1	Y	FM958106.1
	Palaemonetes vulgaris	Y	FJ581830.1	Y	AY743941.1	Y	JQ042300.1	Y	JN674372.1
Achelata	Panulirus argus	Y	GU476034.1	Y	U19182.1	Y	AF502947.1	N	na
	Panulirus ornatus	Y	JN591362.1	Y	JQ229942.1	Y	KF489896.1	Y	KF828097.1
	Sagmariasus (Jasus) verreauxi	Y	FJ174952.1	Y	KF828103.1	Y	AF192874.1	Y	FJ174870.1
	Scyllarides latus	Y	JQ623990.1	Y	AF498669.1	Y	DQ377974.1	Y	FJ174862.1
Stenopodidea	Stenopus hispidus	Y	KJ690260.1	Y	FJ943443.1	Y	FJ943437.1	Y	FJ943457.1
Dendrobranchiata	Penaeus chinensis	Y	EU366231.1	Y	JQ936018.1	Y	AF245113.1	N	na
	Penaeus semisulcatus	Y	KF192814.1	Y	DQ079766.1	Y	GU573957.1	Y	KM486611.1
	Orconectes virilis	Y	AF474365.1	Y	AF235965.1	Y	JN800549.1	Y	JN800706.1
	Porcellana sayana	Y	JN800685.1	Y	JN800619.1	Y	JN800553.1	Y	KF182715.1
Amphipoda misc.	Acanthogammarus victorii	Y	FJ756298.1	Y	AY926817.1	Y	AY926695.1	N	na
	Brandtia latissima	Y	AY926654.1	Y	AY926758.1	Y	AY926698.1	N	na
	Cyphocaris sp.	Y	KP713952.1	N	na	Y	KP456133.1	N	na
	Diplacanthus brevispinus	Y	AY926651.1	Y	AY926754.1	Y	AY926694.1	N	na
	Echinogammarus ischnus	Y	FJ581620.1	N	na	N	na	N	na
	Echinogammarus trichiatus	Y	KM024679.1	N	na	N	na	N	na
	Echinogammarus marinus	Y	GQ341698.1	Y	KF478638.1	N	na	N	na
	Eulimnogammarus cyaneus	Y	FJ756324.1	Y	FJ756228.1	Y	FJ756275.1	N	na
	Eulimnogammarus cruentus	Y	AY926661.1	Y	AY926769.1	Y	AY926709.1	N	na
	Eulimnogammarus viridis	Y	AY926664.1	Y	AY926774.1	Y	AY926714.1	N	na
	Eulimnogammarus maacki	Y	AY926663.1	Y	AY926771.1	Y	AY926711.1	N	na
	Eulimnogammarus vittatus	Y	FJ756326.1	Y	AY926838.1	Y	AY926716.1	N	na
	Gammarus daiberi	Y	DQ300252.1	N	na	N	na	N	na
	Gammarus tigrinus	Y	FJ581678.1	Y	EF582932.1	N	na	N	na
	Gammarus aequicauda	Y	AY926667.1	Y	JF966119.1	Y	AY926718.1	N	na
	Gammarus lacustris	Y	GU066811.1	Y	EF582915.1	Y	AY926724.1	N	na
	Gammarus locusta	Y	GQ341768.1	Y	AF419222.1	Y	AY926726.1	N	na
	Gibberosus longimerus	N	na	Y	DQ378035.1	N	na	N	na
	Hakonboeckia strauchii	Y	AY926676.1	Y	AY926853.1	Y	AY926731.1	N	na
	Macrohectopus branickii	Y	FJ756332.1	Y	AY926854.1	Y	AY926732.1	N	na
	Monoporeia affinis	Y	KM068102.1	Y	AY926861.1	Y	AY926738.1	N	na
	Odontogammarus calcaratus	Y	FJ756341.1	Y	AY926862.1	Y	AY926739.1	N	na
	Onychogammarus pictoides	Y	AY926690.1	Y	AY926870.1	Y	AY926747.1	N	na
	Oxyacanthus flavus	Y	JN393847.1	N	na	N	na	N	na
	Pallasea cancellus	Y	AY926687.1	Y	AY926865.1	Y	FJ756295.1	N	na
	Plesiogammarus brevis	Y	AY926689.1	Y	AY926869.1	Y	AY926746.1	N	na

## Sheet: Sheet2
Abyssorchomene abyssorum
Abyssorchomene chevreuxi
Abyssorchomene nodimanus
Acanthamunnopsis longicornis
Acanthamunnopsis milleri
Acanthocope galatheae
Acanthocope sp.
Acanthogammarus victorii
Acanthomunna spinipes
Aeginina longicornis
Agathotanais ingolfi
Albunea catherinae
Alvinocaris longirostris
Ampelisca brevicornis
Ampelisca diadema
Ampelisca eschrichtii
Ampelisca ledoyeri
Ampelisca sarsi
Ampelisca spinipes
Ampelisca tenuicornis
Ampelisca typica
Amphilochus manudens
Amphilochus tenuimanus
Anaspides tasmaniae
Andaniexis lupus
Andaniopsis nordlandica
Anonyx sarsi
Antarcturus spinacoronatus
Antatelson walkeri
Antennuloniscus armatus
Antennuloniscus sp.
Antrolana lira
Aora gracilis
Aoroides columbiae
Apanthura sp.
Apherusa bispinosa
Apherusa glacialis
Apherusa jurinei
Apseudes talpa
Apseudopsis latreillii
Arcturus baffini
Arrhis phyllonyx
Astacilla intermedia
Astacilla longicornis
Astacus astacus
Atlantapseudes sp.
Atyoida bisulcata
Austinograea alayseae
Austinograea rodriguezensis
Austroniscus sp.
Bathycallisoma schellenbergi
Bathymedon obtusifrons
Bathynectes longispina
Bathynomus doederleinii
Bathynomus giganteus
Betamorpha africana
Betamorpha fusiformis
Bodotria scorpioides
Boreomysis arctica
Brandtia latissima
Byblis gaimardi
Caenanthura sp.
Callinectes sapidus
Calliopius laeviusculus
Campylaspis sp.
Caprella acanthifera
Caprella acanthogaster
Caprella andreae
Caprella californica
Caprella danilevskii
Caprella dilatata
Caprella equilibra
Caprella geometrica
Caprella linearis
Caprella mutica
Caprella penantis
Caprella scaura
Caprella scauroides
Caprella septentrionalis
Caprella simia
Caprella unica
Carcinus maenas
Carpias nereus
Carpoapseudes varindex
Centromedon zoe
Cerapus sp.
Chaulidoniscus sp.
Chelator aequabilis
Chelator insignis
Chelator rugosus
Chelator sp.
Chelator vulgaris
Chelicorophium curvispinum
Chelicorophium robustum
Cherax destructor
Cirolana harfordi
Cirolana kokoru
Cirolana rugicauda
Cirolanides texensis
Colanthura pigmentata
Colurostylis longicaudata
Coperonus sp.
Corophium volutator
Cressa dubia
Cumella sp.
Cumopsis goodsir
Cyathura carinata
Cyathura sp.
Cyclaspis alba
Cyclaspis caprella
Cyclocaris sp.
Cyllopus lucasii
Cyphocaris sp.
Cystisoma gershwinae
Cystisoma pellucida
Dardanus fucosus
Deflexilodes intermedius
Dendromunna sp.
Dendrotion sp.
Dexamine spinosa
Dexamine thea
Diastylis bispinosa
Diastylis crenellata
Diastylis rathkei
Diastylis rugosa
Diastylis sculpta
Diastylis sp.
Diastylopsis thileniusi
Diplacanthus brevispinus
Disconectes antarcticus
Disparella sp.
Dubinectes acutitelson
Dubinectes nodosus
Dulichia falcata
Dulichia sp.
Dyopedos bispinis
Dyopedos porrectus
Echinogammarus ischnus
Echinogammarus marinus
Echinogammarus trichiatus
Echinozone sp.
Elaphognathia rangifer
Elasmopus rapax
Emerita talpoida
Enoplometopus occidentalis
Eocuma longicorne
Epimeria annabellae
Epimeria bruuni
Epimeria cornigera
Epimeria georgiana
Epimeria grandirostris
Epimeria horsti
Epimeria inermis
Epimeria macrodonta
Epimeria macronyx
Epimeria puncticulata
Epimeria reoproi
Epimeria rimicarinata
Epimeria robusta
Epimeria rubrieques
Epimeria schiaparelli
Epimeria similis
Epimeria walkeri
Ericthonius pugnax
Ericthonius punctatus
Eriocheir sinensis
Eucopia sculpticauda
Eudorella pusilla
Eudorella truncatula
Eugerda sp.
Eugerdella huberti
Eugerdella natator
Eugerdella theodori
Eulimnogammarus cruentus
Eulimnogammarus cyaneus
Eulimnogammarus maacki
Eulimnogammarus viridis
Eulimnogammarus vittatus
Eumunida picta
Euphausia pacifica
Eurycope complanata
Eurycope eltaniae
Eurycope glabra
Eurycope sarsi
Eurydice pulchra
Eurythenes gryllus
Eusirus cuspidatus
Eusirus giganteus
Eusirus holmi
Eusirus microps
Eusirus perdentatus
Excirolana braziliensis
Excirolana chiltoni
Excirolana hirsuticauda
Excirolana mayana
Exitomelita sigynae
Exopalaemon carinicauda
Fageapseudes brachyomos
Falklandia reducta
Fuegiphoxus abjectus
Gammaropsis melanops
Gammaropsis nitida
Gammaropsis utinomii
Gammarus aequicauda
Gammarus daiberi
Gammarus lacustris
Gammarus locusta
Gammarus tigrinus
Gastrosaccus psammodytes
Geothelphusa dehaani
Gibberosus longimerus
Gitana sarsi
Globosolembos ovatus
Glossocephalus milneedwardsi
Gnathia limicola
Gnathia maculosa
Gnathia trimaculata
Gnathophausia ingens
Gnathophausia zoea
Gonodactylellus viridis
Gonodactylus chiragra
Gonodactylus smithii
Gracilimesus insignis
Hakonboeckia strauchii
Halirages fulvocinctus
Hansenomysis fyllae
Haplomesus sp.
Haploniscus cassilatus
Haploniscus cucullus
Haploniscus nondescriptus
Haploniscus nudifrons
Haploniscus rostratus
Haploniscus sp.
Haploniscus spinifer
Haploniscus weddellensis
Haploops tubicola
Harpinia antennaria
Harpiosquilla harpax
Hemigrapsus sanguineus
Hemilamprops californicus
Hemilamprops sp.
Hemimysis anomala
Heterocuma sp.
Heteromysis formosa
Hippolyte pleuracanthus
Hirondellea dubia
Hirondellea namarensis
Homarus americanus
Hydroniscus sp.
Iais pubescens
Ianiropsis epilittoralis
Iathrippa sarsi
Iathrippa trilobatus
Iberobathynella magna
Ilyarachna antarctica
Ilyarachna triangulata
Ingolfiella tabularis
Iphinoe trispinosa
Iphinoe truncata
Ischnomesus sp.
Ischyrocerus anguipes
Ischyrocerus latipes
Jaera albifrons
Jaera nordmanni
Janira maculosa
Janirella sp.
Jassa slatteryi
Lamprops quadriplicata
Lamprops sp.
Lanceola loveni
Lepidepecreum umbo
Leptochelia dubia
Leptochelia forresti
Leptochelia itoi
Leptochelia rapax
Leptochelia sp.
Leptocuma sp.
Leucothoe akaoni
Leucothoe akuma
Leucothoe ashleyae
Leucothoe spinicarpa
Leucothoe vulgaris
Leviapseudes sp.
Lophogaster typicus
Lycaea nasuta
Lysiosquillina maculata
Macrobrachium lanchesteri
Macrohectopus branickii
Macrostylis roaldi
Macrostylis sp.
Maera danae
Maera sp.
Mancocuma stellifera
Marocolana delamarei
Mastigoniscus polygomphios
Mastigoniscus sp.
Megamoera subtener
Megamphopus cornutus
Meganyctiphanes norvegica
Melita dentata
Melita formosa
Melita matilda
Melita nitida
Melita palmata
Melphidippa antarctica
Melphidippa borealis
Metopa alderi
Michthyops parvus
Microdeutopus chelifer
Microphasma agassizi
Mimocopelates sp.
Mimonectes loveni
Mirabilicoxa sp.
Monocorophium acherusicum
Monocorophium insidiosum
Monocorophium sextonae
Monoculodes antarcticus
Monoculodes carinatus
Monoculodes packardi
Monoporeia affinis
Monopseudocuma gilsoni
Munneurycope murrayi
Munneurycope sp.
Munnidae sp.
Munnopsis abyssalis
Munnopsis sp.
Munnopsoides sp.
Munnopsurus sp.
Mysis oculata
Nannoniscus sp.
Natatolana borealis
Natatolana gallica
Natatolana meridionalis
Natatolana rossi
Neaxius glyptocercus
Nebalia sp.
Neohela monstrosa
Neojaera antarctica
Neojaera sp.
Neomysis americana
Neotanais sp.
Nephrops norvegicus
Nesotanais ryukyuensis
Nihonotrypaea japonica
Norcapensis mandibulis
Notopais magnifica
Nototanais sp.
Nyctiphanes simplex
Odontogammarus calcaratus
Oediceros saginatus
Oedignathus inermis
Oligochinus lighti
Onesimoides sp.
Onychogammarus pictoides
Oratosquilla oratoria
Orchomene oxystoma
Orchomene pectinatus
Orchomenella franklini
Orchomenella gerulicorbis
Orchomenyx macronyx
Orconectes virilis
Oxyacanthus flavus
Oxyurostylis lecroyae
Oxyurostylis smithi
Paguristes cadenati
Pagurus pollicaris
Palaemonetes vulgaris
Pallasea cancellus
Panulirus argus
Panulirus ornatus
Paracaprella pusilla
Paracaprella tenuis
Paraceradocus gibber
Paracorophium brisbanensis
Paracorophium excavatum
Paracorophium lucasi
Paradoxapseudes (Apseudes) bermudeus
Paradoxapseudes littoralis
Paragnathia formica
Paramoera erimoensis
Paramoera koysama
Paramphithoe hystrix
Paramunnopsis sp.
Paranarthrura sp.
Paranebalia longipes
Paranthura japonica
Paranthura nigropunctata
Paraoroides sp.
Paroediceros propinquus
Paropsurus giganteus
Parvochelus russus
Penaeus chinensis
Penaeus semisulcatus
Perotripus sp.
Photis longicaudata
Phronima bucephala
Phtisica marina
Plesiogammarus brevis
Pleustes panoplus
Podocerus inconspicuus
Podocerus septemcarinatus
Podocerus variegatus
Polycheles typhlops
Pomacuma australiae
Pontogeneia rostrata
Porcellana sayana
Praunus flexuosus
Procambarus clarkii
Prochelator sp.
Protella gracilis
Protogeton sp.
Protomima imitatrix
Pseudocarcinus gigas
Pseudocuma simile
Pseudoleptochelia sp.
Pseudomma affine
Pseudoprotella phasma
Pseudoprotella sp.
Pseudorchomene coatsi
Pseudosphyrapus quintolongus
Pseudosphyrapus serratus
Pseudotanais sp.
Quadrimaera inaequipes
Quadrimaera pacifica
Rhachotropis aculeata
Rhachotropis chathamensis
Rhachotropis helleri
Rhachotropis inflata
Rhachotropis rossi
Rhachotropis sp.
Rhopalophthalmus sp.
Rostroculodes borealis
Sagmariasus (Jasus) verreauxi
Scina borealis
Scylla paramamosain
Scyllarides latus
Siriella armata
Spelaeogriphus lepidops
Speocirolana hardeni
Speocirolana thermydronis
Sphaerolana affinis
Sphaeromides virei
Spilocuma salomani
Squilla empusa
Stegocephalus inflatus
Stenopus hispidus
Stenothoe brevicornis
Stenothoe marina
Stenothoe monoculoides
Stenula rubrovittata
Stephonyx biscayensis
Sternomoera japonica
Sternomoera morinoi
Sternomoera rhyaca
Sternomoera yezoensis
Storthyngura kussakini
Storthyngurella menziesi
Stygiomysis aemete
Stygiomysis cokei
Stygiomysis holthuisi
Stylomesus sp.
Syneurycope heezeni
Syneurycope sp.
Synopia sp.
Syrrhoe psychrophila
Tethysbaena argentarii
Thambema sp.
Themisto gaudichaudii
Thetispelecaris remex
Thylakogaster sp.
Tmetonyx sp.
Typhlocirolana haouzensis
Typhlocirolana moraguesi
Tytthocope sp.
Upogebia major
Upogebia pusilla
Uristes murrayi
Uristes sp.
Urothoe brevicornis
Urothoe elegans
Urothoe poseidonis
Urothoe pulchella
Vanhoeffenura sp.
Vaunthompsonia cristata
Vaunthompsonia minor
Venusticrus thor
Vibilia antarctica
Weyprechtia pinguis
Whoia sp.
Xenograpsus testudinatus
